# Supplementary figures and images for: TMEM16A activation for the fast block to polyspermy in the African clawed frog does not require conventional activation of egg PLCs
Source: PubMed Central journal article supplement — J Gen Physiol. 2023 Aug 10;155(10):e202213258. doi: 10.1085/jgp.202213258 (PMC10405425; doi:10.1085/jgp.202213258), 2023-08-10

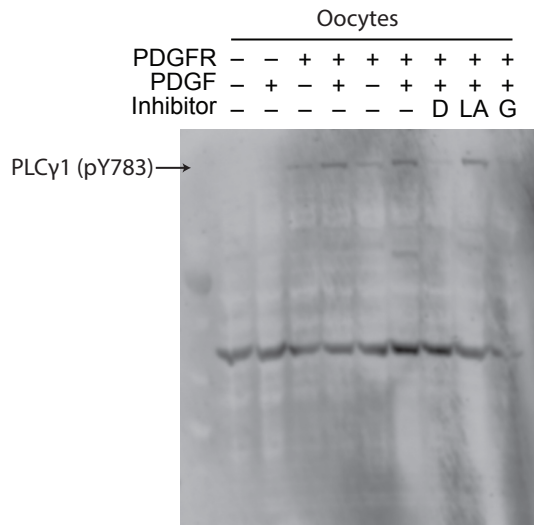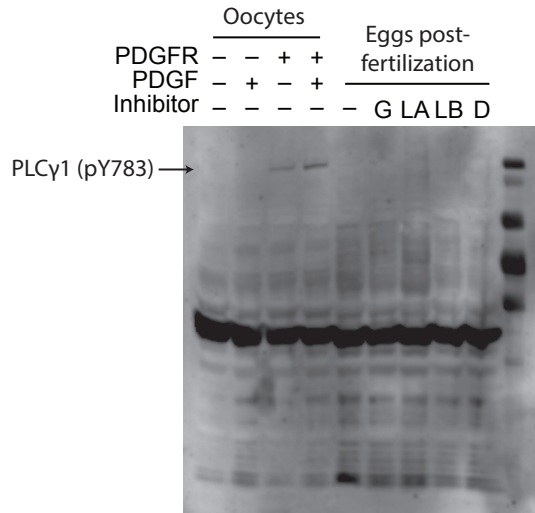

Supplement: JGP_202213258_SourceDataF3.pdf [file JGP_202213258_SourceDataF3.pdf]
